# Supplementary material
Source: PubMed Central journal article supplement (PMC4783470)
Supplement: cr201621x1.pdf [file cr201621x1.pdf]

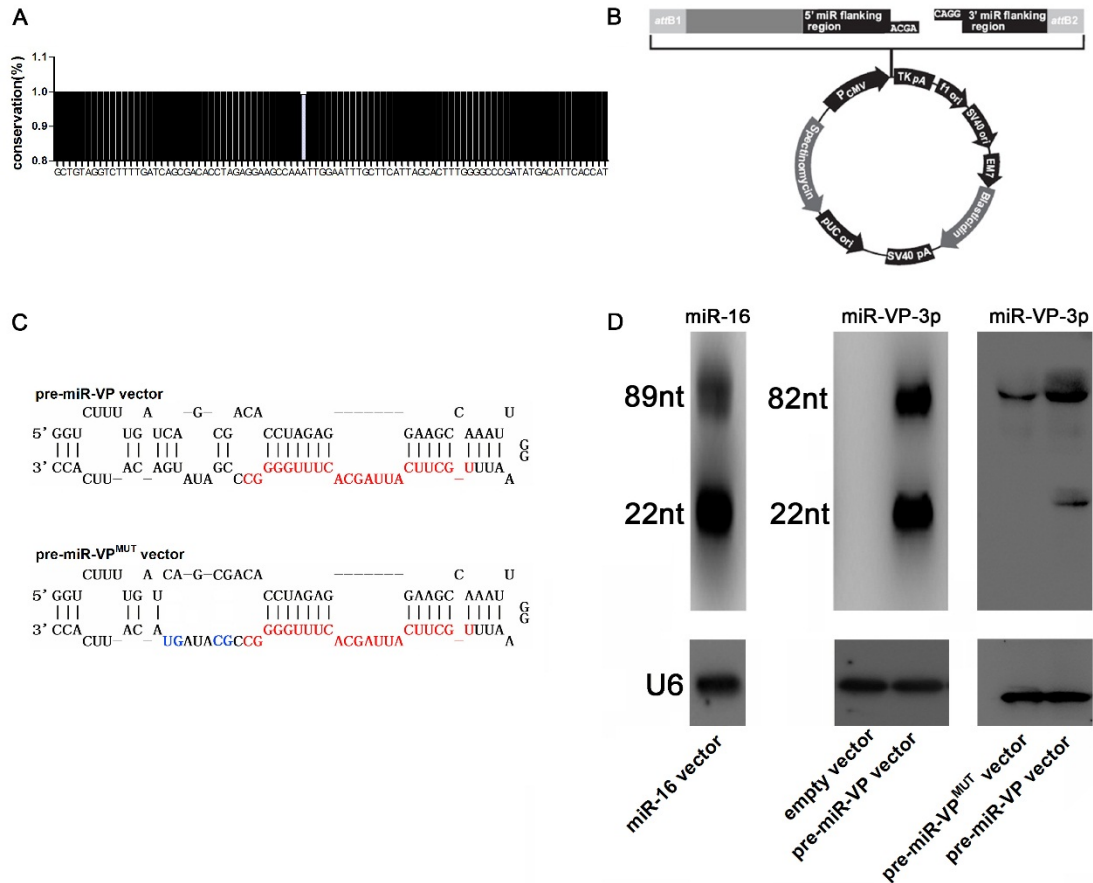

**Supplementary information, Figure S1 EBOV encoded a miRNA-like RNA fragment. (A)** Conservation of the predicted pre-miR-VP in 2014 EBOV strains. **(B)** Structure of the pre-miR-VP and pre-miR-VP<sup>MUT</sup> plasmid. **(C)** The construction of a plasmid that expresses the putative miRNA-like RNA fragments of EBOV. The pre-miR-VP sequence was cloned into the pcDNA6.2-GW/EmGFP plasmid. An empty plasmid or pre-miR-VP<sup>MUT</sup> (sequences in blue was mutant) was used as a negative control. **(D)** The Northern blot analysis of predicted miR-VP-3p using the total RNA derived from HEK293A cells transfected with a pcDNA6.2 plasmid expressing pre-miR-VP. The plasmids expressing pre-miR-16 or pre-miR-VP<sup>MUT</sup> were transfected into HEK293A cells as positive and negative controls, respectively.
