# Supplementary material
Source: PubMed Central journal article supplement (PMC4783470)
Supplement: cr201621x3.pdf [file cr201621x3.pdf]

**Supplementary information, Table S1**

**Table S1A.** The demographic and clinical features of the EBOV-infected patients and healthy volunteers. NA, not available; UD, undetectable.

|                                                   | <b>Healthy volunteers<br/>(N=13)</b> | <b>EVD<sup>+</sup><sub>G</sub><sup>+</sup><br/>(N=27)</b> |
|---------------------------------------------------|--------------------------------------|-----------------------------------------------------------|
| Age                                               | 27.62±15.72                          | 35.08±21.24                                               |
| Sex (male)                                        | 54%                                  | 33%                                                       |
| C <sub>T</sub> Value of EBOV genome               | NA                                   | 25.88±4.59                                                |
| Concentration of EBOV genome in<br>serum (fmol/L) | UD                                   | 220944.02±32017.87                                        |

**Table S1B.** The demographic and clinical features of the EBOV survivors in the acute phase (EVD<sup>+</sup><sub>G(P→N)</sub>) and convalescence phase (EVD<sup>-</sup><sub>G(P→N)</sub>). NA, not available; UD, undetectable.

| Patient ID | Age | Sex | EBOV genome tested Date | C <sub>T</sub> Value of EBOV genome | Concentration of EBOV genome in serum (fmol/L) | Concentration of miR-VP-3p in serum (fmol/L) |
|------------|-----|-----|-------------------------|-------------------------------------|------------------------------------------------|----------------------------------------------|
| W/UI15082  | 28  | M   | 2014-11-18              | 29.4                                | 2294.26                                        | 466.09                                       |
|            |     |     | 2014-11-27              | NA                                  | UD                                             | UD                                           |
| WUR15598   | 24  | F   | 2014-11-18              | 37.5                                | 10.16                                          | 18.98                                        |
|            |     |     | 2014-11-28              | NA                                  | UD                                             | UD                                           |
| WUR18-204  | 9   | F   | 2014-12-02              | 29.44                               | 2233.67                                        | 219.91                                       |
|            |     |     | 2014-12-04              | NA                                  | UD                                             | UD                                           |
| WUR18-356  | 28  | M   | 2014-11-21              | 27.65                               | 7399.33                                        | 727.28                                       |
|            |     |     | 2014-12-04              | NA                                  | UD                                             | UD                                           |
| WUR18-362  | 8   | F   | 2014-11-29              | 35.8                                | 31.68                                          | 60.2                                         |
|            |     |     | 2014-12-04              | NA                                  | UD                                             | UD                                           |
| WUR18-365  | 33  | F   | 2014-11-30              | 36.5                                | 19.83                                          | 24.08                                        |
|            |     |     | 2014-12-01              | NA                                  | UD                                             | UD                                           |
| WUR18-371  | 41  | F   | 2014-11-29              | 32.77                               | 240.61                                         | 65.46                                        |
|            |     |     | 2014-12-04              | NA                                  | UD                                             | UD                                           |
| WUR18-382  | 27  | F   | 2014-12-18              | 32.12                               | 371.72                                         | 210.89                                       |
|            |     |     | 2014-12-23              | NA                                  | UD                                             | UD                                           |

**Table S1C.** The demographic and clinical features of the suspected EVD patients. NA, not available; UD, undetectable.

| Patient ID | Age | Sex | EBOV genome tested Date | C <sub>T</sub> Value of EBOV genome | Concentration of EBOV genome in serum (fmol/L) | Concentration of miR-VP-3p in serum (fmol/L) |
|------------|-----|-----|-------------------------|-------------------------------------|------------------------------------------------|----------------------------------------------|
| WUR18-290  | 54  | M   | 2014-11-21              | NA                                  | UD                                             | 38.83                                        |
|            |     |     | 2014-11-22              | 31.18                               | 697.23                                         | 62.6                                         |
| WUR18-293  | 32  | M   | 2014-11-21              | NA                                  | UD                                             | 40.72                                        |
|            |     |     | 2014-11-22              | 30.97                               | 802.42                                         | 34.1                                         |
| WUR18-294  | 24  | F   | 2014-11-21              | NA                                  | UD                                             | 369.16                                       |
|            |     |     | 2014-11-22              | 24.33                               | 68231.4                                        | 238.45                                       |
| WRU05189   | 23  | F   | 2014-11-23              | NA                                  | UD                                             | 317.17                                       |
|            |     |     | 2014-11-25              | 26.49                               | 16080.08                                       | 96.41                                        |
| WUR15627   | 29  | F   | 2014-12-01              | NA                                  | UD                                             | 36.84                                        |
|            |     |     | 2014-12-02              | 26.34                               | 17777.81                                       | 67.36                                        |
| WUI050188  | 65  | M   | 2014-12-24              | NA                                  | UD                                             | 304.96                                       |
|            |     |     | 2014-12-25              | 19.75                               | 1461949                                        | 672.22                                       |
| WUR17-335  | 24  | M   | 2014-11-21              | NA                                  | UD                                             | UD                                           |
|            |     |     | 2014-11-22              | NA                                  | UD                                             | UD                                           |
| WUI0167    | 32  | M   | 2014-11-21              | NA                                  | UD                                             | UD                                           |
|            |     |     | 2014-11-22              | NA                                  | UD                                             | UD                                           |
| WUR18-508  | 23  | F   | 2014-11-21              | NA                                  | UD                                             | UD                                           |
|            |     |     | 2014-11-22              | NA                                  | UD                                             | UD                                           |
| WUR18-509  | 29  | M   | 2014-11-23              | NA                                  | UD                                             | UD                                           |
|            |     |     | 2014-11-25              | NA                                  | UD                                             | UD                                           |
| WUR18-500  | 24  | F   | 2014-12-01              | NA                                  | UD                                             | UD                                           |
|            |     |     | 2014-12-02              | NA                                  | UD                                             | UD                                           |
| WUR18-526  | 20  | F   | 2014-12-24              | NA                                  | UD                                             | UD                                           |
|            |     |     | 2014-12-25              | NA                                  | UD                                             | UD                                           |
| WUR18-539  | 30  | M   | 2014-12-01              | NA                                  | UD                                             | UD                                           |
|            |     |     | 2014-12-02              | NA                                  | UD                                             | UD                                           |
| WUR18-536  | 23  | M   | 2014-12-24              | NA                                  | UD                                             | UD                                           |
|            |     |     | 2014-12-25              | NA                                  | UD                                             | UD                                           |
| WUR18-529  | 17  | F   | 2014-12-24              | NA                                  | UD                                             | UD                                           |
|            |     |     | 2014-12-25              | NA                                  | UD                                             | UD                                           |
